# Supplementary material for: Achieving and sustaining reduction in hospital-acquired complications in an Australian local health service
Source: PubMed Central journal article supplement — BMJ Open Qual. 2024 Nov 4;13(4):e002940. doi: 10.1136/bmjoq-2024-002940 (PMC11535702; doi:10.1136/bmjoq-2024-002940), 2024-11-04
Supplement: bmjoq-13-4-s001.pdf [file bmjoq-13-4-s001.pdf]

Table 1: Hospital acquired complications list v3.1 ACSQHC and interventions applied in this study

| HAC Group                                                       | Diagnosis                                                                                                                                                                                                                                                                                                                                                                                                                                                             | Interventions                                                                                                                                                                                                                                                          | Modified IHI 90-Day Cycle                                                                                               |
|-----------------------------------------------------------------|-----------------------------------------------------------------------------------------------------------------------------------------------------------------------------------------------------------------------------------------------------------------------------------------------------------------------------------------------------------------------------------------------------------------------------------------------------------------------|------------------------------------------------------------------------------------------------------------------------------------------------------------------------------------------------------------------------------------------------------------------------|-------------------------------------------------------------------------------------------------------------------------|
| 1. Pressure injury                                              | <ul style="list-style-type: none"> <li>• Stage III ulcer</li> <li>• Stage IV ulcer</li> <li>• Unspecified decubitus ulcer and pressure area</li> <li>• Unstageable pressure injury</li> <li>• Suspected deep tissue injury</li> </ul>                                                                                                                                                                                                                                 | <ul style="list-style-type: none"> <li>• General</li> <li>• Cultural</li> </ul>                                                                                                                                                                                        | <ul style="list-style-type: none"> <li>• Not applied</li> </ul>                                                         |
| 2. Falls resulting in fracture or intracranial injury           | <ul style="list-style-type: none"> <li>• Intracranial injury</li> <li>• Fractured neck of femur</li> <li>• Other fractures</li> </ul>                                                                                                                                                                                                                                                                                                                                 | <ul style="list-style-type: none"> <li>• General</li> <li>• Cultural</li> </ul>                                                                                                                                                                                        | <ul style="list-style-type: none"> <li>• Not applied</li> </ul>                                                         |
| 3. Healthcare-associated infection                              | <ul style="list-style-type: none"> <li>• Urinary tract infection</li> <li>• Surgical site infection</li> <li>• Pneumonia</li> <li>• Blood stream infection</li> <li>• Infections or inflammatory complications associated with peripheral/central venous catheters</li> <li>• Multi-resistant organism</li> <li>• Infection associated with prosthetics/implantable devices</li> <li>• Gastrointestinal infections</li> <li>• Other high impact infections</li> </ul> | <ul style="list-style-type: none"> <li>• General</li> <li>• Cultural</li> <li>• Targeted contextualized interventions, e.g., comprehensive oral care, invasive device management, hydration, mobilization; targeted real-time bedside auditing and feedback</li> </ul> | <ul style="list-style-type: none"> <li>• Applied with objective data for feedback</li> </ul>                            |
| 4. Surgical complications requiring unplanned return to theatre | <ul style="list-style-type: none"> <li>• Post-operative haemorrhage/haematoma requiring transfusion and/or return to theatre</li> <li>• Surgical wound dehiscence</li> <li>• Anastomotic leak</li> <li>• Vascular graft failure</li> <li>• Other surgical complications requiring unplanned return to theatre</li> </ul>                                                                                                                                              | <ul style="list-style-type: none"> <li>• General</li> <li>• Cultural</li> <li>• Targeted contextualized interventions, e.g., dressing selection criteria for median and high-risk patient; antibiotic prescription for prolonged procedures</li> </ul>                 | <ul style="list-style-type: none"> <li>• Applied without objective data for feedback</li> </ul>                         |
| 5. *Unplanned intensive care unit admission                     | <ul style="list-style-type: none"> <li>• Unplanned admission to intensive care unit</li> </ul>                                                                                                                                                                                                                                                                                                                                                                        | <ul style="list-style-type: none"> <li>• Not applicable</li> </ul>                                                                                                                                                                                                     | <ul style="list-style-type: none"> <li>• Not applicable</li> </ul>                                                      |
| 6. Respiratory complications                                    | <ul style="list-style-type: none"> <li>• Respiratory failure including acute respiratory distress syndrome requiring ventilation</li> <li>• Aspiration pneumonia</li> <li>• Pulmonary oedema</li> </ul>                                                                                                                                                                                                                                                               | <ul style="list-style-type: none"> <li>• General</li> <li>• Cultural</li> <li>• Targeted contextualized interventions for aspiration pneumonia, e.g., comprehensive oral care</li> </ul>                                                                               | <ul style="list-style-type: none"> <li>• Applied (for aspiration pneumonia) with objective data for feedback</li> </ul> |
| 7. Venous thromboembolism                                       | <ul style="list-style-type: none"> <li>• Pulmonary embolism</li> <li>• Deep vein thrombosis</li> </ul>                                                                                                                                                                                                                                                                                                                                                                | <ul style="list-style-type: none"> <li>• General</li> <li>• Cultural</li> <li>• Targeted contextualized interventions e.g., appropriate prescription of anticoagulant for patient at risk</li> </ul>                                                                   | <ul style="list-style-type: none"> <li>• Applied with objective data for feedback</li> </ul>                            |
| 8. Renal failure                                                | <ul style="list-style-type: none"> <li>• Renal failure requiring</li> </ul>                                                                                                                                                                                                                                                                                                                                                                                           | <ul style="list-style-type: none"> <li>• General</li> </ul>                                                                                                                                                                                                            | <ul style="list-style-type: none"> <li>• Not applied due to small</li> </ul>                                            |

|                                                                     |                                                                                                                                                                                                                                                                                                                       |                                                                                                                                                                                                                                                                                 |                                                                                                                                                                                                                                                  |
|---------------------------------------------------------------------|-----------------------------------------------------------------------------------------------------------------------------------------------------------------------------------------------------------------------------------------------------------------------------------------------------------------------|---------------------------------------------------------------------------------------------------------------------------------------------------------------------------------------------------------------------------------------------------------------------------------|--------------------------------------------------------------------------------------------------------------------------------------------------------------------------------------------------------------------------------------------------|
|                                                                     | haemodialysis or continuous veno-venous haemodialysis                                                                                                                                                                                                                                                                 | <ul style="list-style-type: none"> <li>• Cultural</li> <li>• Targeted contextualized interventions by specialists who reviewed, disseminated, and applied findings from each case</li> </ul>                                                                                    | number of cases with low level of preventability; objective data available for feedback through clinical case reviews                                                                                                                            |
| 9. Gastrointestinal bleeding                                        | <ul style="list-style-type: none"> <li>• Gastrointestinal bleeding</li> </ul>                                                                                                                                                                                                                                         | <ul style="list-style-type: none"> <li>• General</li> <li>• Cultural</li> </ul>                                                                                                                                                                                                 | <ul style="list-style-type: none"> <li>• Not applied</li> </ul>                                                                                                                                                                                  |
| 10. Medication complications                                        | <ul style="list-style-type: none"> <li>• Drug related respiratory complications/depression</li> <li>• Haemorrhagic disorder due to circulating anticoagulants</li> <li>• Movement disorders due to psychotropic medication</li> <li>• Serious alteration to conscious state due to psychotropic medication</li> </ul> | <ul style="list-style-type: none"> <li>• General</li> <li>• Cultural</li> <li>• Targeted contextualized interventions, e.g., targeted auditing &amp; feedback for prescription by clinical pharmacists</li> </ul>                                                               | <ul style="list-style-type: none"> <li>• Not applied; embedded process with objective data for feedback</li> </ul>                                                                                                                               |
| 11. Delirium                                                        | <ul style="list-style-type: none"> <li>• Delirium</li> </ul>                                                                                                                                                                                                                                                          | <ul style="list-style-type: none"> <li>• General</li> <li>• Cultural</li> <li>• Targeted contextualized interventions, e.g., Cognitive Impairment Program, peri-operative interventions for surgical patients; 4AT-screening for delirium &amp; cognitive impairment</li> </ul> | <ul style="list-style-type: none"> <li>• Not applied; embedded process with objective data for feedback</li> </ul>                                                                                                                               |
| 12. Incontinence                                                    | <ul style="list-style-type: none"> <li>• Urinary incontinence</li> <li>• Faecal incontinence</li> </ul>                                                                                                                                                                                                               | <ul style="list-style-type: none"> <li>• General</li> <li>• Cultural</li> <li>• Targeted contextualized interventions by specialists who reviewed, disseminated, and applied findings from each case</li> </ul>                                                                 | <ul style="list-style-type: none"> <li>• Not applied due to small number of cases with low level of preventability; objective data available for feedback through clinical case reviews</li> </ul>                                               |
| 13. Endocrine complications                                         | <ul style="list-style-type: none"> <li>• Malnutrition</li> <li>• Hypoglycemia</li> </ul>                                                                                                                                                                                                                              | <ul style="list-style-type: none"> <li>• General</li> <li>• Cultural</li> <li>• Targeted contextualized interventions, e.g., <i>Make 4mmol/L the Floor</i> for blood glucose level management; Think HYPOglycemia campaign</li> </ul>                                           | <ul style="list-style-type: none"> <li>• Applied with objective data for feedback</li> </ul>                                                                                                                                                     |
| 14. Cardiac complications                                           | <ul style="list-style-type: none"> <li>• Heart failure and pulmonary oedema</li> <li>• Arrhythmias</li> <li>• Cardiac arrest</li> <li>• Acute coronary syndrome including unstable angina, STEMI and NSTEMI</li> </ul>                                                                                                | <ul style="list-style-type: none"> <li>• General</li> <li>• Cultural</li> <li>• Targeted contextualized interventions, e.g., HAC Matters Report on Cardiac Complications; clinical documentation review for unspecified atrial fibrillation (AF)</li> </ul>                     | <ul style="list-style-type: none"> <li>• Not applied, embedded processes with objective data for feedback</li> <li>• This complication benefited from improving clinical documentation to reduce unspecified AF as a HAC <sup>3</sup></li> </ul> |
| 15. *Third and fourth degree of perineal laceration during delivery | <ul style="list-style-type: none"> <li>• Third- and fourth-degree perineal laceration during delivery</li> </ul>                                                                                                                                                                                                      | <ul style="list-style-type: none"> <li>• General</li> <li>• Cultural</li> </ul>                                                                                                                                                                                                 | <ul style="list-style-type: none"> <li>• Not applied although local efforts to implement the Women's Healthcare Australasia Perineal Protection Bundle <sup>4</sup></li> </ul>                                                                   |
| 16. *Neonatal birth trauma                                          | <ul style="list-style-type: none"> <li>• Neonatal birth trauma</li> <li>• Hypoxic ischemic encephalopathy</li> </ul>                                                                                                                                                                                                  | <ul style="list-style-type: none"> <li>• General</li> <li>• Cultural</li> </ul>                                                                                                                                                                                                 | <ul style="list-style-type: none"> <li>• Not applied</li> </ul>                                                                                                                                                                                  |

\*Currently not considered for the IHACPA risk adjustment model therefore no funding adjustment.

**Table 2: HAC rate modelling as a function of year with and without adjustment for risk factors**

| Complication                                                      | Year               | Rate | Unadjusted 95% confidence interval | p     | Rate | Adjusted 95% confidence interval | p     |
|-------------------------------------------------------------------|--------------------|------|------------------------------------|-------|------|----------------------------------|-------|
| All HACs                                                          | Baseline (n=5419)  | 1    | Reference                          | -     | 1    | Reference                        | -     |
|                                                                   | 2019 (n=2171)      | 0.77 | 0.73-0.81                          | <.001 | 0.79 | 0.75-0.83                        | <.001 |
|                                                                   | 2020 (n=2133)      | 0.75 | 0.71-0.79                          | <.001 | 0.74 | 0.71-0.82                        | <.001 |
|                                                                   | 2021 (n=2372)      | 0.78 | 0.74-0.82                          | <.001 | 0.76 | 0.73-0.80                        | <.001 |
|                                                                   | 2022 (n=2339)      | 0.82 | 0.78-0.86                          | <.001 | 0.79 | 0.75-0.83                        | <.001 |
| Pressure injury                                                   | Baseline (n=165)   | 1    | Reference                          | -     | 1    | Reference                        | -     |
|                                                                   | 2019 (n=69)        | 0.81 | 0.61-1.07                          | 0.130 | 0.87 | 0.65-1.15                        | 0.314 |
|                                                                   | 2020 (n=46)        | 0.53 | 0.38-0.73                          | <.001 | 0.52 | 0.38-0.73                        | <.001 |
|                                                                   | 2021 (n=62)        | 0.67 | 0.50-0.90                          | 0.007 | 0.65 | 0.49-0.88                        | 0.004 |
|                                                                   | 2022 (n=86)        | 0.99 | 0.76-1.28                          | 0.916 | 0.90 | 0.69-1.17                        | 0.440 |
| Falls resulting in fracture or intracranial injury                | Baseline (n=94)    | 1    | Reference                          | -     | 1    | Reference                        | -     |
|                                                                   | 2019 (n=55)        | 1.13 | 0.81-1.57                          | 0.484 | 1.11 | 0.80-1.55                        | 0.526 |
|                                                                   | 2020 (n=47)        | 0.95 | 0.67-1.35                          | 0.746 | 0.90 | 0.63-1.29                        | 0.568 |
|                                                                   | 2021 (n=46)        | 0.87 | 0.61-1.24                          | 0.446 | 1.81 | 0.57-1.16                        | 0.256 |
|                                                                   | 2022 (n=46)        | 0.93 | 0.65-1.32                          | 0.669 | 0.86 | 0.60-1.22                        | 0.388 |
| (*T) Healthcare-associated infection                              | Baseline (n=2,136) | 1    | Reference                          | -     | 1    | Reference                        | -     |
|                                                                   | 2019 (n=853)       | 0.78 | 0.71-0.83                          | <.001 | 0.80 | 0.74-0.87                        | <.001 |
|                                                                   | 2020 (n=791)       | 0.70 | 0.65-0.76                          | <.001 | 0.69 | 0.64-0.75                        | <.001 |
|                                                                   | 2021 (n=1053)      | 0.88 | 0.82-0.95                          | <.001 | 0.84 | 0.78-0.90                        | <.001 |
|                                                                   | 2022 (n=1083)      | 0.96 | 0.89-1.03                          | 0.265 | 0.91 | 0.84-0.98                        | 0.011 |
| (*T) Surgical complications requiring unplanned return to theatre | Baseline (n=109)   | 1    | Reference                          | -     | 1    | Reference                        | -     |
|                                                                   | 2019 (n=43)        | 0.76 | 0.53-1.08                          | 0.126 | 0.81 | 0.57-1.16                        | 0.253 |
|                                                                   | 2020 (n=55)        | 0.96 | 0.69-1.32                          | 0.788 | 0.99 | 0.72-1.37                        | 0.950 |
|                                                                   | 2021 (n=72)        | 1.18 | 0.87-1.59                          | 0.284 | 1.19 | 0.88-1.60                        | 0.263 |
|                                                                   | 2022 (n=67)        | 1.16 | 0.86-1.58                          | 0.331 | 1.19 | 0.88-1.62                        | 0.256 |
| (*T) Respiratory complications                                    | Baseline (n=653)   | 1    | Reference                          | -     | 1    | Reference                        | -     |
|                                                                   | 2019 (n=262)       | 0.77 | 0.67-0.89                          | <.001 | 0.81 | 0.70-0.94                        | 0.005 |
|                                                                   | 2020 (n=280)       | 0.81 | 0.71-0.94                          | 0.004 | 0.84 | 0.73-0.97                        | 0.015 |
|                                                                   | 2021 (n=357)       | 0.97 | 0.86-1.11                          | 0.689 | 0.99 | 0.87-1.12                        | 0.819 |
|                                                                   | 2022 (n=330)       | 0.96 | 0.84-1.09                          | 0.507 | 0.94 | 0.82-1.08                        | 0.372 |
| (*T) Venous thromboembolism                                       | Baseline (n=190)   | 1    | Reference                          | -     | 1    | Reference                        | -     |
|                                                                   | 2019 (n=55)        | 0.56 | 0.41-0.75                          | <.001 | 0.59 | 0.43-0.78                        | <.001 |
|                                                                   | 2020 (n=58)        | 0.58 | 0.43-0.78                          | <.001 | 0.58 | 0.44-0.79                        | <.001 |
|                                                                   | 2021 (n=64)        | 0.60 | 0.45-0.80                          | <.001 | 0.59 | 0.45-0.79                        | <.001 |
|                                                                   | 2022 (n=60)        | 0.60 | 0.45-0.80                          | <.001 | 0.58 | 0.43-0.78                        | <.001 |
| Renal failure                                                     | Baseline (n=73)    | 1    | Reference                          | -     | 1    | Reference                        | -     |
|                                                                   | 2019 (n=33)        | 0.87 | 0.58-1.31                          | 0.507 | 0.95 | 0.63-1.44                        | 0.817 |
|                                                                   | 2020 (n=35)        | 0.91 | 0.61-1.36                          | 0.642 | 0.97 | 0.65-1.46                        | 0.898 |
|                                                                   | 2021 (n=21)        | 0.51 | 0.32-0.83                          | 0.007 | 0.51 | 0.31-0.83                        | 0.007 |

|                                                        |                    |      |           |       |      |           |       |
|--------------------------------------------------------|--------------------|------|-----------|-------|------|-----------|-------|
|                                                        | 2022 (n=23)        | 0.60 | 0.37-0.95 | 0.030 | 0.59 | 0.37-0.95 | 0.029 |
| Gastrointestinal bleeding                              | Baseline (n=223)   | 1    | Reference | -     | 1    | Reference | -     |
|                                                        | 2019 (n=102)       | 0.88 | 0.70-1.11 | 0.287 | 0.91 | 0.72-1.15 | 0.410 |
|                                                        | 2020 (n=100)       | 0.85 | 0.67-1.08 | 0.177 | 0.83 | 0.66-1.06 | 0.132 |
|                                                        | 2021 (n=110)       | 0.88 | 0.70-1.10 | 0.267 | 0.84 | 0.67-1.06 | 0.135 |
|                                                        | 2022 (n=106)       | 0.90 | 0.71-1.13 | 0.368 | 0.85 | 0.67-1.07 | 0.167 |
| (*T) Medication complications                          | Baseline (n=305)   | 1    | Reference | -     | 1    | Reference | -     |
|                                                        | 2019 (n=146)       | 0.92 | 0.76-1.12 | 0.416 | 0.92 | 0.76-1.13 | 0.431 |
|                                                        | 2020 (n=116)       | 0.72 | 0.58-0.89 | 0.003 | 0.74 | 0.60-0.92 | 0.006 |
|                                                        | 2021 (n=102)       | 0.60 | 0.48-0.75 | <.001 | 0.61 | 0.49-0.76 | <.001 |
|                                                        | 2022 (n=95)        | 0.59 | 0.47-0.74 | <.001 | 0.60 | 0.47-0.75 | <.001 |
| (*T) Delirium                                          | Baseline (n=933)   | 1    | Reference | -     | 1    | Reference | -     |
|                                                        | 2019 (n=387)       | 0.79 | 0.71-0.90 | <.001 | 0.81 | 0.72-0.91 | <.001 |
|                                                        | 2020 (n=388)       | 0.79 | 0.70-0.89 | <.001 | 0.80 | 0.71-0.90 | <.001 |
|                                                        | 2021 (n=389)       | 0.74 | 0.66-0.84 | <.001 | 0.74 | 0.65-0.83 | <.001 |
|                                                        | 2022 (n=371)       | 0.75 | 0.67-0.85 | <.001 | 0.75 | 0.66-0.84 | <.001 |
| (*T) Incontinence                                      | Baseline (n=89)    | 1    | Reference | -     | 1    | Reference | -     |
|                                                        | 2019 (n=22)        | 0.48 | 0.30-0.76 | 0.002 | 0.49 | 0.30-0.79 | 0.003 |
|                                                        | 2020 (n=23)        | 0.49 | 0.31-0.78 | 0.002 | 0.48 | 0.30-0.76 | 0.002 |
|                                                        | 2021 (n=33)        | 0.66 | 0.44-0.99 | 0.042 | 0.63 | 0.42-0.93 | 0.022 |
|                                                        | 2022 (n=21)        | 0.45 | 0.28-0.72 | 0.001 | 0.41 | 0.25-0.66 | <.001 |
| (*T) Endocrine complications                           | Baseline (n=739)   | 1    | Reference | -     | 1    | Reference | -     |
|                                                        | 2019 (n=295)       | 0.77 | 0.67-0.88 | <.001 | 0.80 | 0.70-0.92 | <.001 |
|                                                        | 2020 (n=292)       | 0.75 | 0.65-0.86 | <.001 | 0.76 | 0.66-0.87 | <.001 |
|                                                        | 2021 (n=366)       | 0.88 | 0.78-1.00 | 0.050 | 0.89 | 0.78-1.00 | 0.069 |
|                                                        | 2022 (n=332)       | 0.85 | 0.75-0.97 | 0.014 | 0.83 | 0.73-0.94 | 0.005 |
| (*T) Cardiac complications                             | Baseline (n=1,090) | 1    | Reference | -     | 1    | Reference | -     |
|                                                        | 2019 (n=354)       | 0.63 | 0.56-0.71 | <.001 | 0.65 | 0.57-0.73 | <.001 |
|                                                        | 2020 (n=352)       | 0.61 | 0.54-0.69 | <.001 | 0.64 | 0.56-0.72 | <.001 |
|                                                        | 2021 (n=294)       | 0.48 | 0.42-0.55 | <.001 | 0.49 | 0.43-0.56 | <.001 |
|                                                        | 2022 (n=259)       | 0.45 | 0.39-0.52 | <.001 | 0.46 | 0.41-0.53 | <.001 |
| 3rd and 4th degree perineal laceration during delivery | Baseline (n=141)   | 1    | Reference | -     | 1    | Reference | -     |
|                                                        | 2019 (n=53)        | 0.72 | 0.53-0.99 | 0.045 | 0.72 | 0.52-0.99 | 0.040 |
|                                                        | 2020 (n=53)        | 0.71 | 0.52-0.98 | 0.035 | 0.79 | 0.58-1.09 | 0.147 |
|                                                        | 2021 (n=77)        | 0.97 | 0.74-1.28 | 0.846 | 0.92 | 0.69-1.21 | 0.535 |
|                                                        | 2022 (n=75)        | 1.00 | 0.76-1.33 | 0.965 | 0.80 | 0.60-1.06 | 0.114 |
| Neonatal birth trauma                                  | Baseline (n=51)    | 1    | Reference | -     | 1    | Reference | -     |
|                                                        | 2019 (n=21)        | 0.79 | 0.48-1.32 | 0.370 | 0.82 | 0.49-1.37 | 0.447 |
|                                                        | 2020 (n=21)        | 0.78 | 0.47-1.30 | 0.339 | 0.79 | 0.47-1.31 | 0.360 |
|                                                        | 2021 (n=20)        | 0.70 | 0.42-1.17 | 0.174 | 0.63 | 0.37-1.08 | 0.092 |
|                                                        | 2022 (n=16)        | 0.59 | 0.34-1.04 | 0.069 | 0.54 | 0.31-0.95 | 0.034 |

\*T indicates that targeted intervention/s were implemented for this HAC.
